# Supplementary material
Source: PubMed Central journal article supplement (PMC529326)

**A** 2 mM CaCl<sub>2</sub>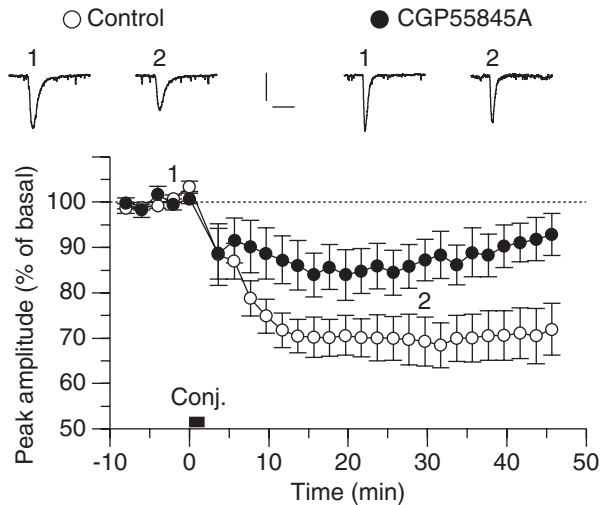**B** 2 mM CaCl<sub>2</sub>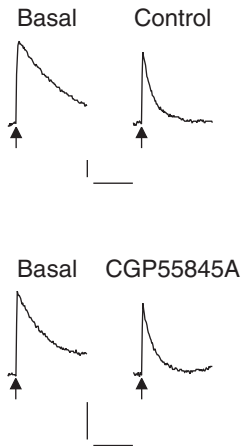**C**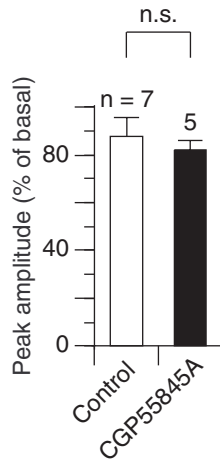

Supplement: pnas_101_48_16952__2.pdf [file pnas_101_48_16952__2.pdf]
